# Supplementary material
Source: publisher figshare collection journal article supplement (https://rs.figshare.com/ndownloader/files/11657615)
Supplement: Supplementary file 1 [file 11657615]

**
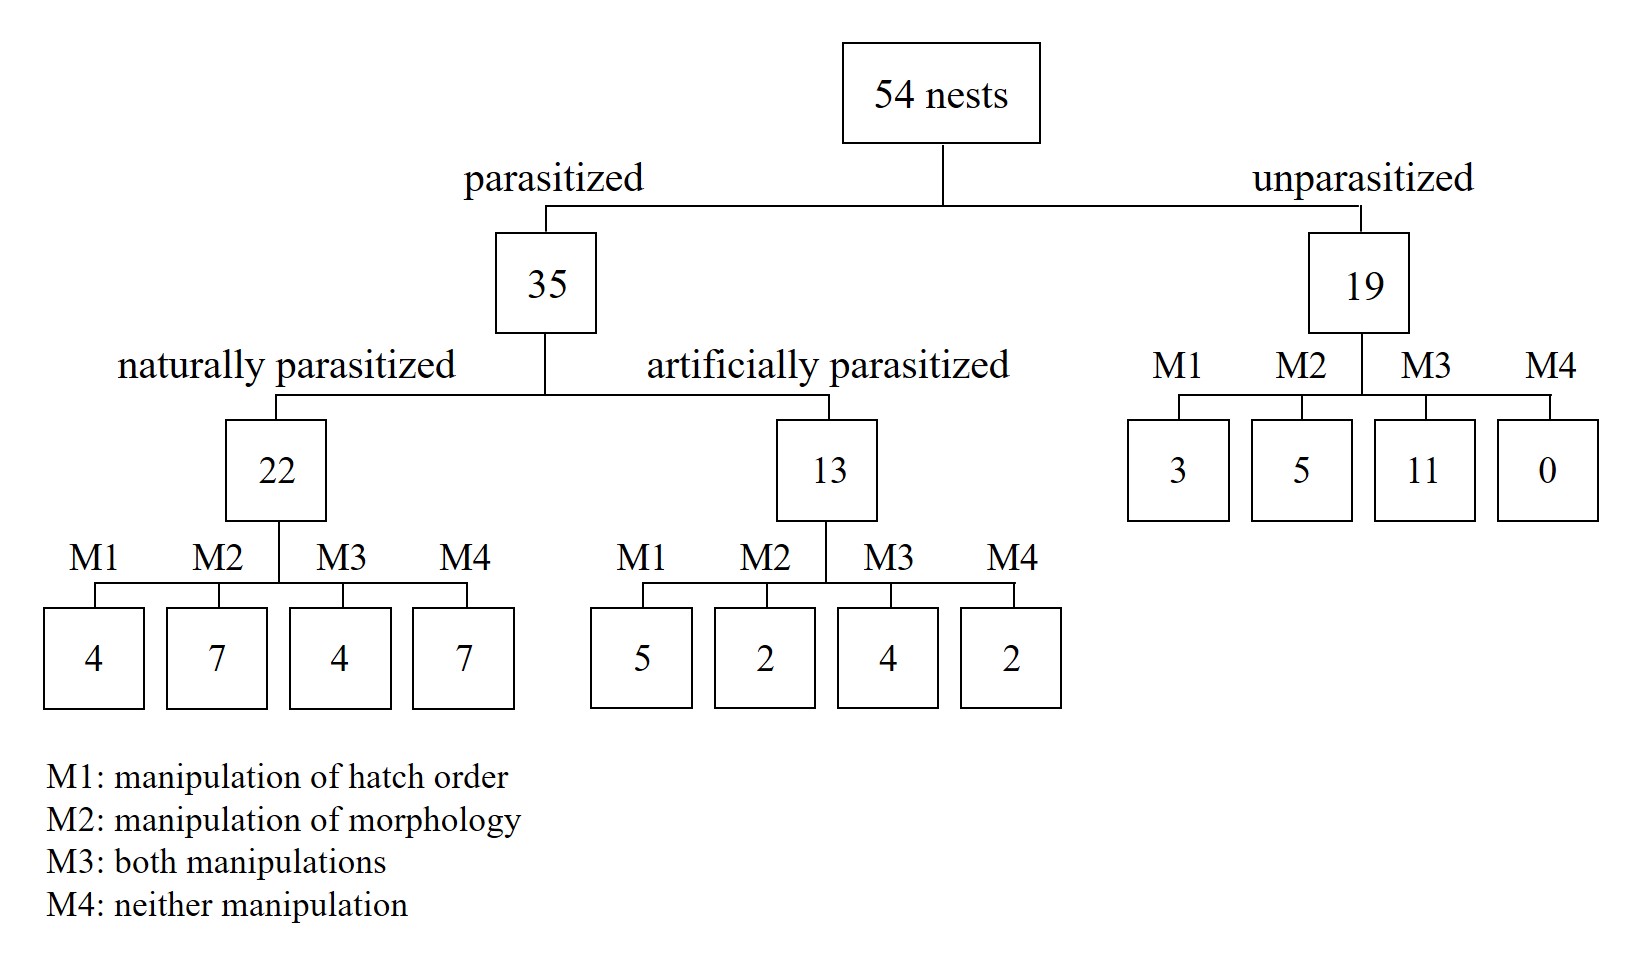
**

**Figure S1.** Flow diagram showing the design of the experiment. Numbers in boxes indicate the sample size of nests in the assigned treatments (M1-M4).
